# Supplementary material for: Engineering Immunomodulatory and Osteoinductive Implant Surfaces via Mussel Adhesion-Mediated Ion Coordination and Molecular Clicking
Source: Research Square preprint supplement (doi:10.21203/rs.3.rs-408681/v1), 2021-04-21
Supplement: Supplementary file 1 [file fd03ed20a4c859c8f2f0a00f.docx]

**Engineering Immunomodulatory and Osteoinductive Implant Surfaces via Mussel Adhesion-Mediated Ion Coordination and Molecular Clicking**

*Tao Wang1,* *2*†*, Jiaxiang Bai3*†*, Min Lu1, Chenglong Huang2, Dechun Geng3, Gang Chen2, Lei Wang1, Jin Qi1***, Wenguo Cui1***, and Lianfu Deng1**

1Department of Orthopaedics, Shanghai Key Laboratory for Prevention and Treatment of Bone and Joint Diseases, Shanghai Institute of Traumatology and Orthopaedics, Ruijin Hospital, Shanghai Jiao Tong University School of Medicine, 197 Ruijin 2nd Road, Shanghai 200025, P. R. China.

2Jiaxing Key Laboratory of Basic Research and Clinical Translation on Orthopedic Biomaterials, Department of Orthopaedics, The second Affiliated Hospital of Jiaxing University, 1518 North Huancheng Road, Jiaxing 314000, P. R. China.

3Department of Orthopaedics, The First Affiliated Hospital of Soochow University, 188 Shizi Street, Suzhou, Jiangsu 215006, P. R. China.

†These authors contributed equally to this work.

*Corresponding author. E-mail: jinjin838@hotmail.com (J. Qi); [wgcui80@hotmail.com](mailto:wgcui80@hotmail.com) (W. Cui); [lf_deng@126.com](mailto:lf_deng@126.com) (L. Deng)

***
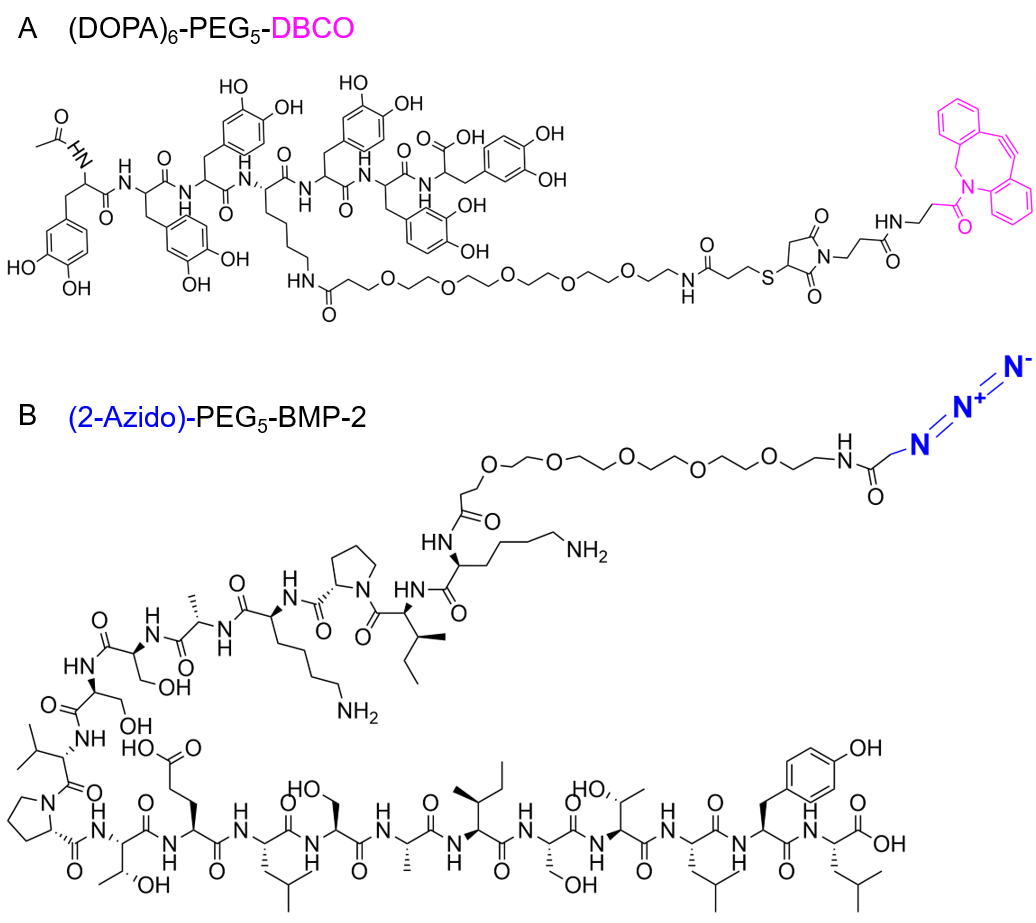
***

***Figure S1.*** *The molecular structures of (DOPA)6-PEG5-DBCO (A) and (2-Azido)-PEG5-BMP-2 (B).*

***
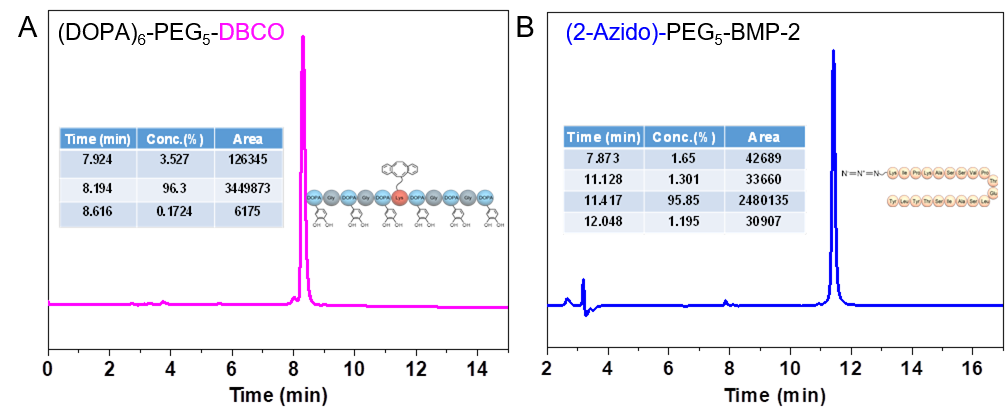
***

***Figure S2.*** *HPLC spectra of (DOPA)6-PEG5-DBCO (A) and (**2-Azido)-PEG5-BMP-2 (B) with purity (>95%).*


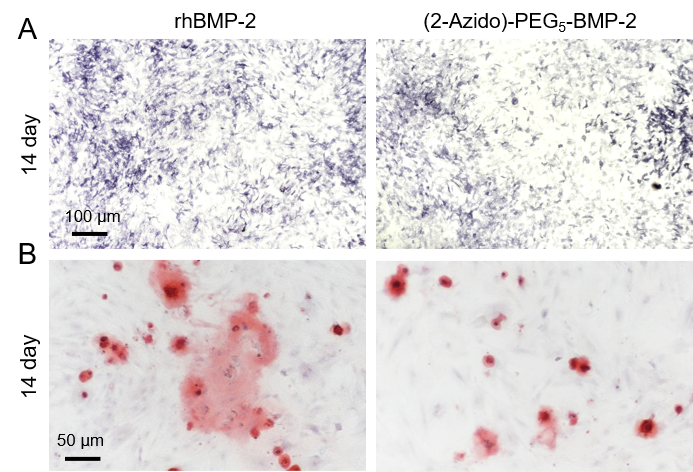


***Figure S3. (A)*** *ALP staining and (B) Alizarin Red S staining of BM-MSCs cultured in osteogenic medium supplemented with rhBMP-2 or (2-Azido)-PEG5-BMP-2.*

***
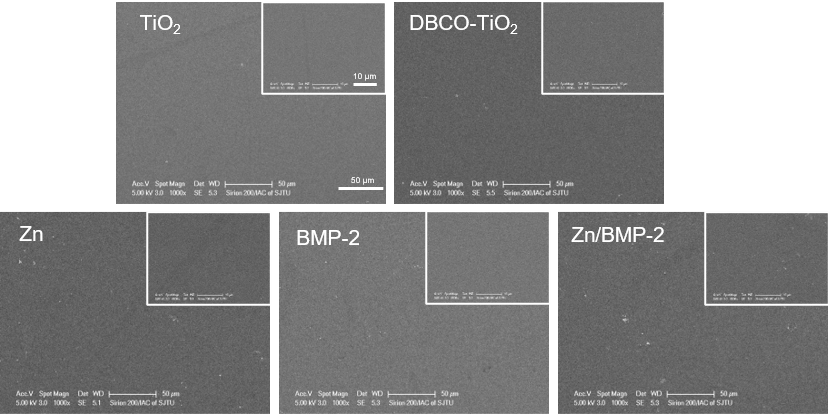
***

***Figure S4.*** *SEM images of the different surfaces (TiO2, DBCO-TiO2, Zn, BMP-2 and Zn/BMP-2 groups).*

***
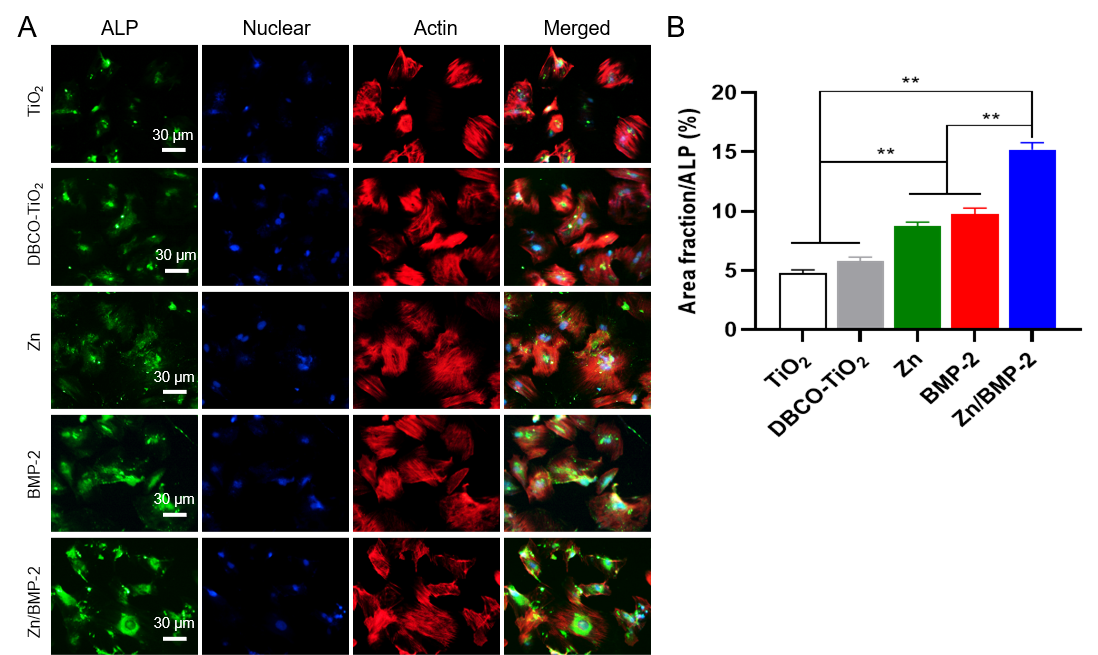
***

***Figure S5****. Images of the BM-MSCs after immunofluorescent staining:(green: ALP; red: cytoskeleton and blue: nuclei) and (H) quantitative results.*


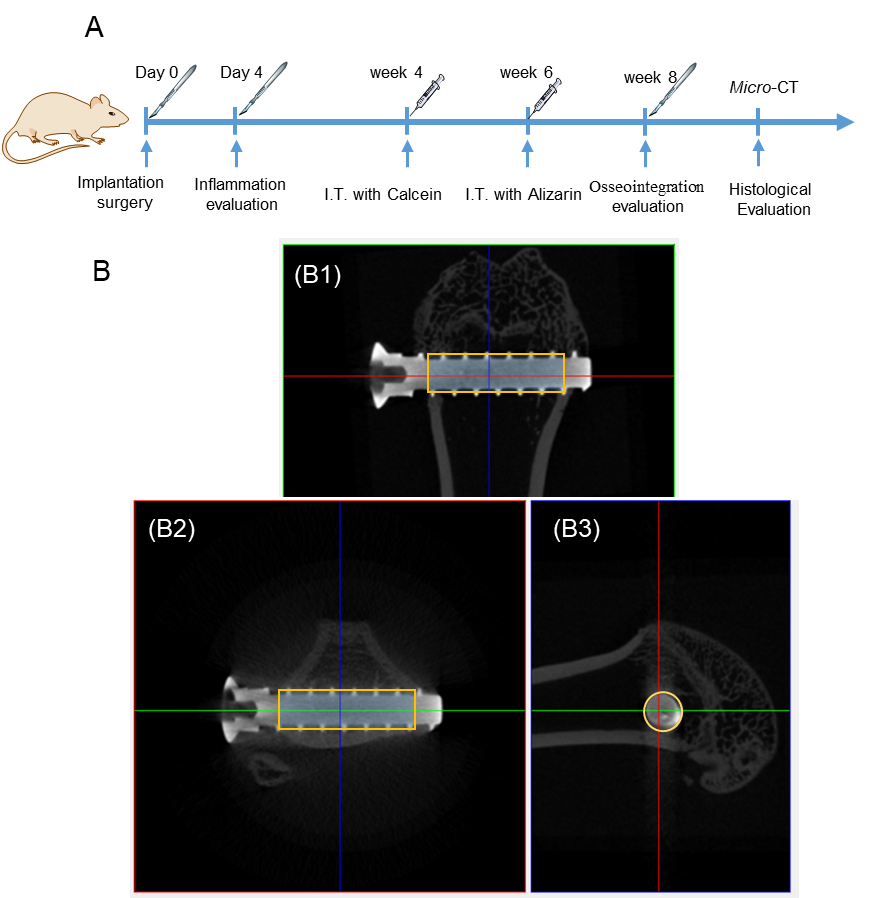


***Figure S6.*** *(A) Scheme for implantation surgery for in vivo tests and treatment process; (B) At each 3D location (shown as cross-hair), three orthogonal views are retrieved from the whole dataset and shown as (B1) coronal view (the normal images, in x-y plane), (B2) transaxial view (x-z plane), (B3) sagittal view (z-y plane).*

***
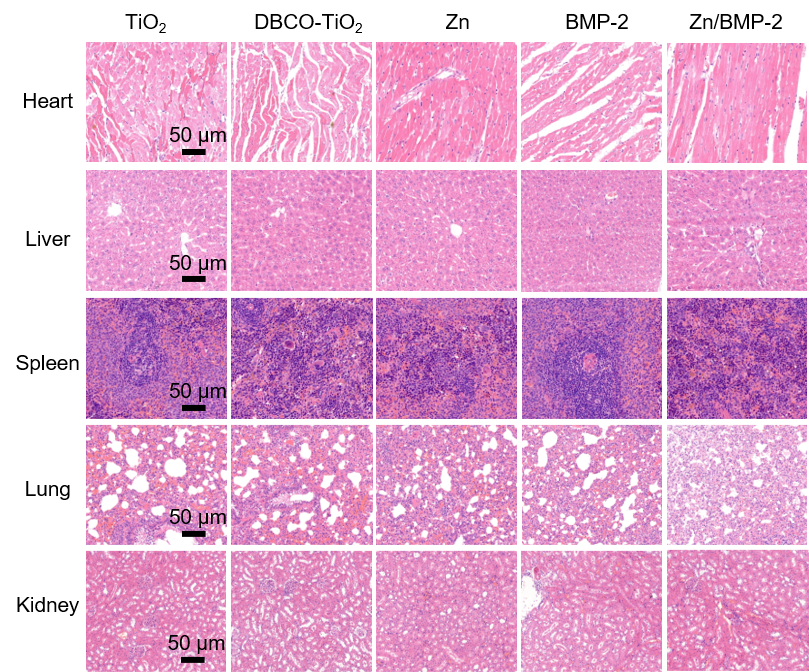
***

***Figure S7.*** *Toxicities of samples on heart, liver, spleen, lung and kidney. H&E staining of the organ tissue sections (50 μm).*

***Table S1.*** Statistics of chemical compositions using XPS on the different surfaces *(TiO2, DBCO-TiO2, Zn, BMP-2 and Zn/BMP-2 groups).*

| Element | Atomic (%) | | | | |
| --- | --- | --- | --- | --- | --- |
| TiO2 | DBCO-TiO2 | Zn | BMP-2 | Zn/BMP-2 |
| Ti | 16.71 | 12.65 | 10.0 | 9.83 | 9.15 |
| C | 39.22 | 45.97 | 44.77 | 50.30 | 45.10 |
| O | 43.20 | 37.15 | 39.73 | 33.10 | 38.29 |
| N | 0.87 | 4.20 | 2.72 | 6.74 | 4.89 |
| Zn | 0.00 | 0.00 | 2.78 | 0.03 | 2.57 |
| N/Ti | 0.052 | 0.332 | 0.272 | 0.686 | 0.534 |
| Zn/Ti | 0.000 | 0.000 | 0.278 | 0.003 | 0.281 |

***Table S2.*** *Primers used in the RT-PCR of BM-MSCs and BMMs cells.*

| Cell | Gene | Primers Sequence(5‘-3‘) |
| --- | --- | --- |
| BM-MSCs | ALP | F: ATGCTCAGGACAGGATCAAA |
|  | R: CGGGACATAAGCGAGTTTCT |
| Col-1 | F: AGCTCGATACACAATGGCCT |
|  | R: CCTATGACTTCTGCGTCTGG |
| Runx-2 | F: ATCATTCAGTGACACCACCA |
|  | F: ATCATTCAGTGACACCACCA |
| OPN | F: GAACATGAAATGCTTCTTTCTCAG |
|  | R: TCCATGAAGCCACAAACTAAACTA |
| β-actin | F: CCTCTATGACAACACAGT |
|  | R: AGCCACCAATCCACACAG |
| RAW 264.7 | TNF-α | F: GTTCCCAAATGGCCTCCC |
|  | R: GTGCTCCTCACCCACACCG |
| IL-10 | F: CCCTTTGCTATGGTGTCCT |
|  | R: GTGGCCAGTTTGTTATTTAT |
| CD206 | F: TACTTGGACGGATAGATGGAGG |
|  | R: CATAGAAAGGAATCCACGCAGT |
| CCR7 | F: GGTGGCTCTCCTTGTCATTTTC |
|  | F: GGTGGCTCTCCTTGTCATTTTC |
| VEGF | F: AGGAGTACCCCGACGAGATAGA |
|  | R: CACATCTGCTGTGCTGTAGGAA |
| BMP-2 | F: AACGAGAAAAGCGTCAAGCC |
|  | R: AGGTGCCACGATCCAGTCAT |
| β-actin | F: GTGACGTTGACATCCGTAAAGA |
|  | R: GTAACAGTCCGCCTAGAAGCAC |
